# Supplementary material
Source: Springer Nature journal article supplement (https://www.springermedizin.de/resource/supplementary/13063_2014_2150_MOESM6_ESM.pdf/9621498)
Supplement: MOESM6 [file 9621498]

PubMed Search results: 742 papers

630 excluded after title/abstract screening for evidently not meeting our inclusion criteria (e.g. studies in adults, non-pharmacological interventions, exploratory/Phase I/II studies etc.)

112 Papers selected for full-text appraisal

42 papers excluded after full-text reading for not meeting our inclusion criteria (e.g. factorial designs, dose-response studies, studies in adults etc.)

70 papers included in review, 1 described two distinct trials

71 trials included in all analyses, except registration rate (70)
